# Supplementary figures and images for: Towards an advanced electrochemical horizon: ion selectivity and energy harnessing through hybrid capacitive deionization with carbon-coated NaTi2(PO4)3 and N-rich carbon nests
Source: Royal Society of Chemistry journal article supplement (doi:10.1039/d4ta04413d), 2024-01-01

# Supplementary videos

# Yellow Lighting-up

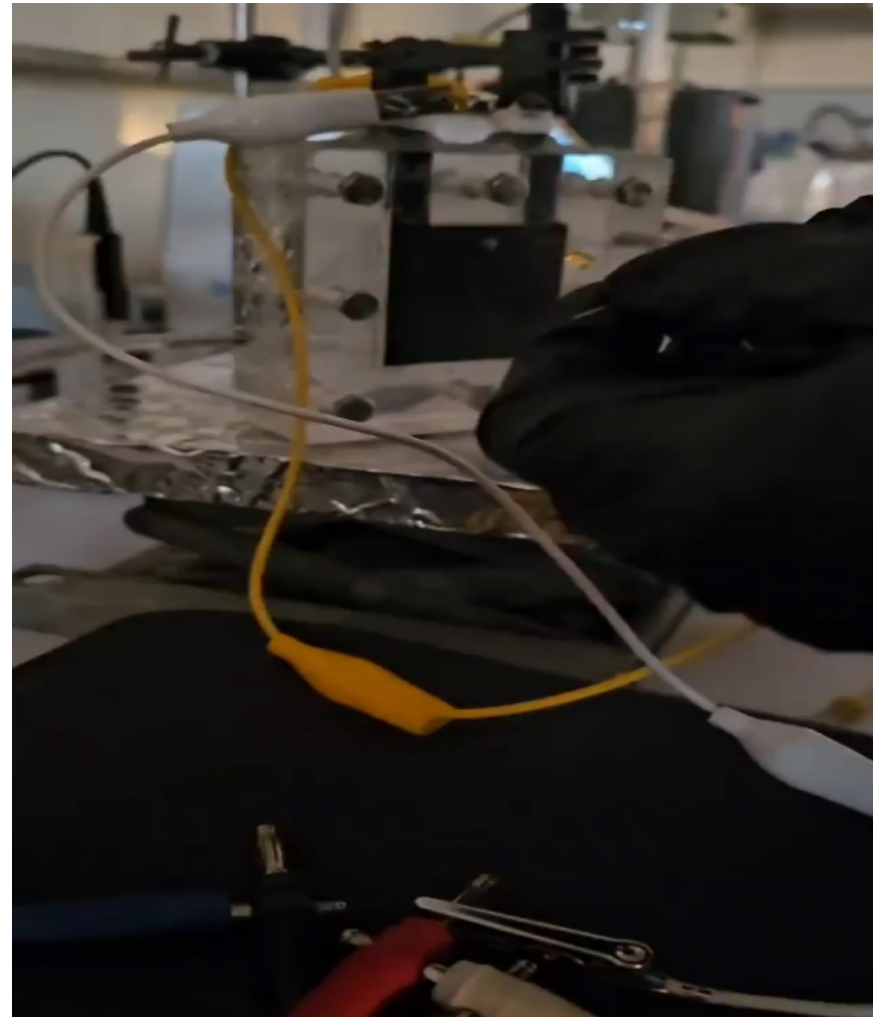

# Green Lighting-up

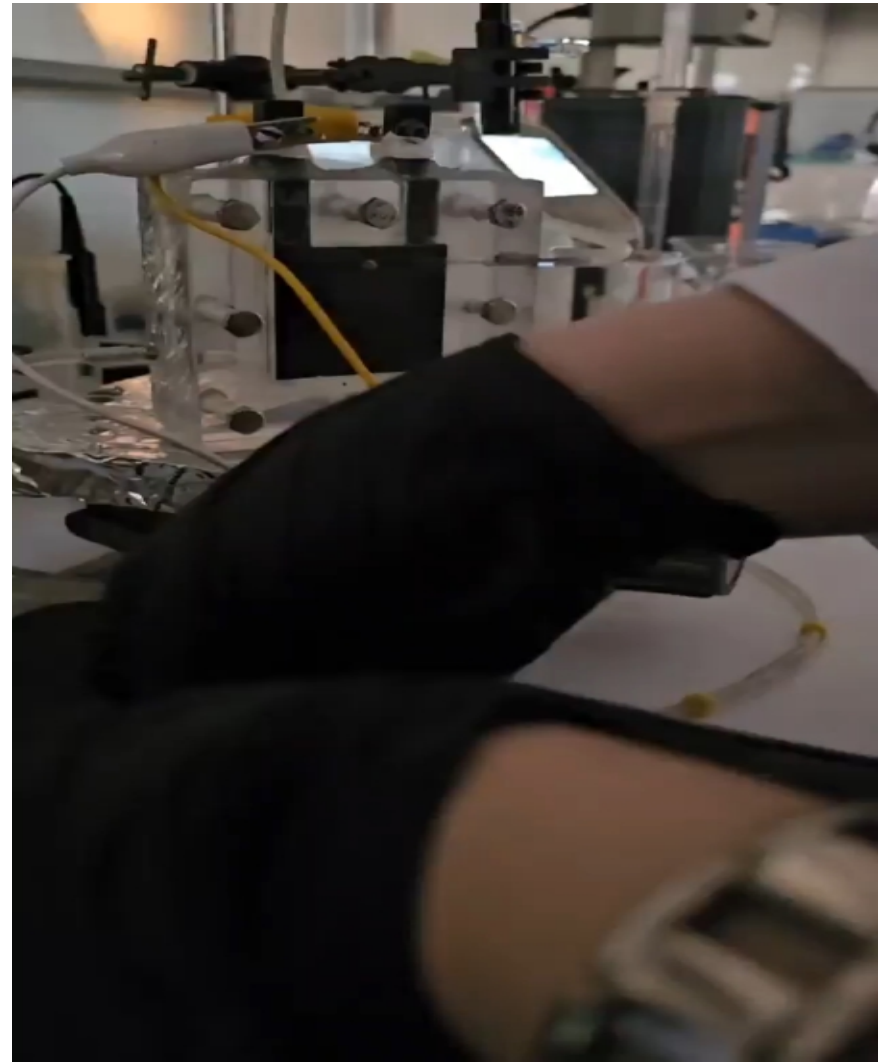

# Red Lighting-up

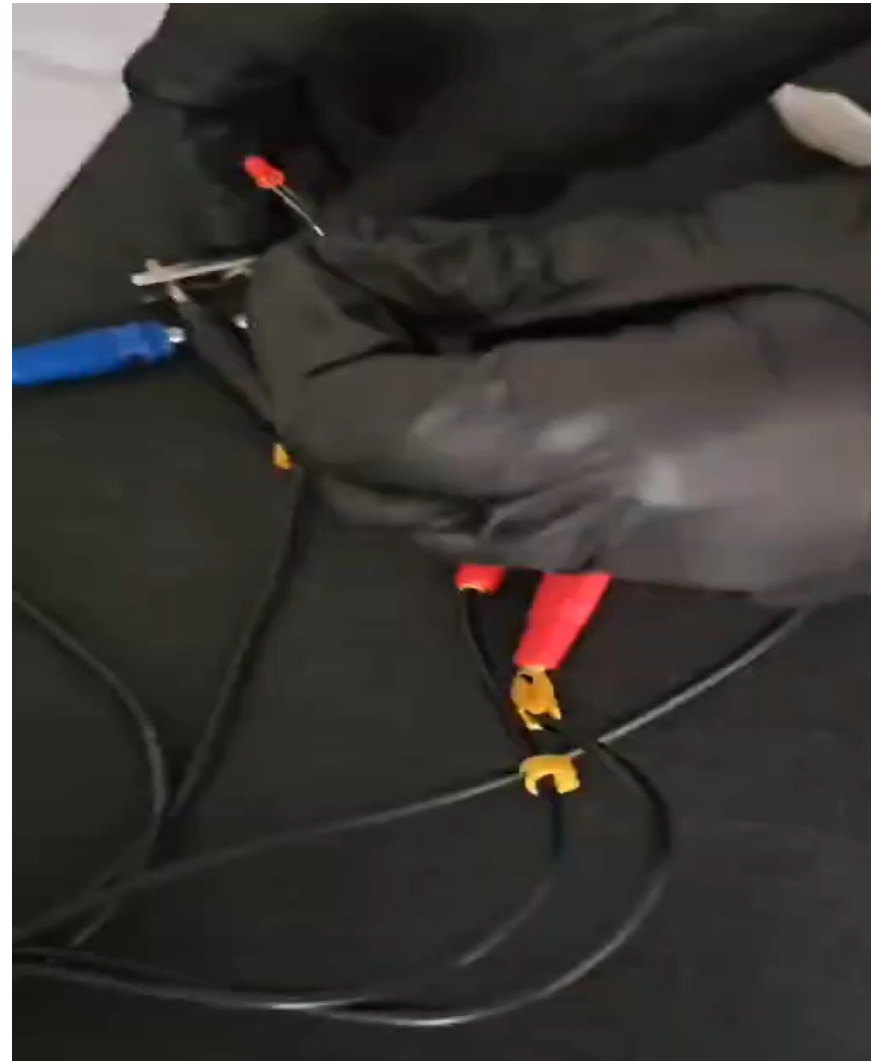

Supplement: d4ta04413d1.pdf [file d4ta04413d1.pdf]
